# Supplementary material for: Molecular mechanism for Rabex-5 GEF activation by Rabaptin-5
Source: eLife. 2014 Jun 23;3:e02687. doi: 10.7554/eLife.02687 (PMC4102244; doi:10.7554/eLife.02687)
Supplement: Figure 1—source data 2. — DOI: http://dx.doi.org/10.7554/eLife.02687.006 [file elife02687s002.doc]

**Figure 1-Source data 2. Interactions between Rabex-5CC and Rabaptin-5C21 in the Rabex-5CC-Rabaptin-5C212 complex.**

**(A) Hydrogen bonds and salt bridges (≤ 3.5 Å)**

**Rabex-5CC Distance (Å) Rabaptin-5C21A Rabaptin-5C21B**

Asn421-N 3.2 Arg602-N

Asn421-O3.3 Arg602-N

Arg423-N 2.5 Glu607-O

Arg423-N 2.8 Glu607-O

Arg423-N 2.9 Gln604-O

Gln424-N 2.9 Leu599-O

Glu430-O 3.0 Gln614-N

Gln450-O 2.9 Gln627-N

**(B) van der Waals contacts (≤ 4.0 Å)**

**Rabex-5CC Rabaptin-5C21A Rabaptin-5C21B**

Leu420 (4) a Ile596 (1) Leu599 (2)

Val600 (1)

Asn421 (6) Leu599 (3)

Arg602 (3)

Arg423 (13) Gln604 (4)

Glu607 (9)

Gln424 (8) Leu599 (5)

Arg602 (3)

Glu425 (1) Arg602 (1)

Arg426 (3) Glu607 (3)

Ile427 (8) Ala603 (1) Ser606 (2)

Glu607 (4)

Leu610 (1)

Met428 (4) Ala605 (1)

Ser606 (1)

Leu609 (2)

Glu430 (4) Leu610 (1)

Gln614 (3)

Ala431 (3) Leu610 (1) Leu609 (1)

Leu613 (1)

Lys432 (1) Leu609 (1)

Leu434 (3) Leu610 (1)

Leu613 (1)

Leu617 (1)

Glu435 (4) Leu609 (1)

Glu612 (1)

Leu613 (2)

Asp437 (1) Leu617 (1)

Leu438 (2) Leu617 (2)

Trp441 (15) Leu617 (1) Ala620 (3)

Ala620 (1) Lys621 (1)

Lys621 (4) Val624 (5)

Thr442 (1) Ala620 (1)

Ile445 (4) Val624 (1) Val624 (2)

Gln627 (1)

Ala446 (1) Gln627 (1)

Glu448 (2) Met628 (2)

Val449 (7) Gln627 (4)

Val630 (1)

Leu631 (2)

Gln450 (2) Gln627 (2)

Ile452 (3) Met632 (3)

a There are a total of 100 van der Waals contacts. Number in parentheses refers to the number of van der Waals contacts the residue is involved.
